# Supplementary material for: Proteomic comparison of basal endosperm in maize miniature1 mutant and its wild-type Mn1
Source: Front Plant Sci. 2013 Jun 25;4:211. doi: 10.3389/fpls.2013.00211 (PMC3691554; doi:10.3389/fpls.2013.00211)
Supplement: Table S4 — agriGO results for soluble proteins. [file DataSheet4.XLSX]

## Sheet: Sheet1
Supplementary Table 4. agriGO results for SP
GO term	Ontology	Description	Number in input list	Number in BG/Ref	p-value	FDR
GO:0006412	P	translation	121	1071	1.6e-23	2.9e-21
GO:0009056	P	catabolic process	147	1552	1.2e-20	1.1e-18
GO:0006519	P	cellular amino acid and derivative metabolic process	76	600	1.9e-18	1.2e-16
GO:0006091	P	generation of precursor metabolites and energy	64	546	2.7e-14	1.2e-12
GO:0005975	P	carbohydrate metabolic process	94	1097	9.3e-12	3.4e-10
GO:0008152	P	metabolic process	634	12161	3.7e-09	1.1e-07
GO:0019725	P	cellular homeostasis	24	164	3.4e-08	8.8e-07
GO:0019538	P	protein metabolic process	254	4516	1.4e-07	3.3e-06
GO:0019748	P	secondary metabolic process	14	67	2.7e-07	5.5e-06
GO:0044267	P	cellular protein metabolic process	204	3535	3.1e-07	5.6e-06
GO:0044237	P	cellular metabolic process	438	9105	0.00011	0.0018
GO:0044238	P	primary metabolic process	465	10134	0.0017	0.023
GO:0009987	P	cellular process	535	11754	0.0017	0.023
GO:0009058	P	biosynthetic process	238	5027	0.0036	0.047
GO:0008135	F	translation factor activity, nucleic acid binding	28	118	1.5e-14	1.4e-12
GO:0005198	F	structural molecule activity	95	1229	1.5e-09	6.6e-08
GO:0003824	F	catalytic activity	575	11249	8.9e-08	2.7e-06
GO:0003723	F	RNA binding	43	560	3.3e-05	0.00074
GO:0000166	F	nucleotide binding	200	3970	0.00053	0.0096
GO:0005737	C	cytoplasm	272	2005	3.2e-62	3.8e-60
GO:0044444	C	cytoplasmic part	175	1518	1.8e-33	1.1e-31
GO:0032991	C	macromolecular complex	197	2352	1.5e-20	5.8e-19
GO:0030529	C	ribonucleoprotein complex	95	847	7.5e-19	2e-17
GO:0005840	C	ribosome	90	779	8.5e-19	2e-17
GO:0044424	C	intracellular part	342	5133	3.1e-17	6.3e-16
GO:0005739	C	mitochondrion	32	187	3.2e-12	5.4e-11
GO:0005622	C	intracellular	357	6032	1.1e-11	1.7e-10
GO:0043232	C	intracellular non-membrane-bounded organelle	117	1608	9.1e-10	1.1e-08
GO:0043228	C	non-membrane-bounded organelle	117	1608	9.1e-10	1.1e-08
GO:0005783	C	endoplasmic reticulum	16	136	9.2e-05	0.001
GO:0031967	C	organelle envelope	19	186	0.00015	0.0015
GO:0031975	C	envelope	20	228	0.00073	0.0067
GO:0043229	C	intracellular organelle	203	4082	0.00086	0.0069
GO:0043226	C	organelle	203	4082	0.00086	0.0069
GO:0044422	C	organelle part	66	1167	0.0025	0.018
GO:0044446	C	intracellular organelle part	66	1167	0.0025	0.018
